# Supplementary material for: Human placenta-derived mesenchymal stem cells trigger repair system in TAA-injured rat model via antioxidant effect
Source: PubMed Central journal article supplement (PMC7835021; doi:10.18632/aging.202348), 2020-12-26
Supplement: aging-13-202348-s002.pdf [file aging-13-202348-s002.pdf]

## SUPPLEMENTARY TABLES

**Supplementary Table 1. Primer sequences used in quantitative real time polymerase chain reaction.**

| Gene   | Accession Number | Sequence (5' – 3')                                               | Tm (°C) |
|--------|------------------|------------------------------------------------------------------|---------|
| NOX4   | NM_053524.1      | F: 5'-AGGTGTCTGCATGGTGGTG-3'<br>R: 5'-GAGGGTGAGTGTCTAAATTGGT-3'  | 55      |
| HO1    | NM_012580.2      | F: 5'-TGCACATCCGTGCAGAGAAT-3'<br>R: 5'-CTGGGTCTGCTTGTTTCGC-3'    | 55      |
| SOD    | NM_017050.1      | F: 5'-TTTTGCTCTCCCAGGTTCCG-3'<br>R: 5'-TGTCTGACACCACAACCTGG-3'   | 55      |
| CAT    | NM_012520.2      | F: 5'-ACGAGATGGCACACTTTGACAG-3'<br>R: 5'-ACACCGGGGACCAAATGATG-3' | 55      |
| ALB    | NM_134326.2      | F: 5'-CTTCAAGCCTGGGCAGTAG-3'<br>R: 5'-GCACTGGCTTATCACAGCAA-3'    | 60      |
| Lhx8   | NM_001012219.1   | F: 5'-GTATCACTTGGCTTGCTT-3'<br>R: 5'-ATTACCGTTCTCCACTTC-3'       | 55      |
| Nanos3 | NM_001105945.1   | F: 5'-CTCTGCATGAGGAAGAGGAGC-3'<br>R: 5'-GGACTGATAGATCGCACGAG-3'  | 55      |
| Nobox  | NM_001192013.1   | F: 5'-AGCCAGTGCAGATCTGCACC-3'<br>R: 5'-TGTCCTGCCAGGAACATCCCTC-3' | 55      |
| Lin28a | NM_001109269.1   | F: 5'-CCCGGTGGACGTCTTTGTG-3'<br>R: 5'-CACTGCCTCACCTCCTTGA-3'     | 55      |
| GAPDH  | NM_017008.4      | F: 5'-TCCCTCAAGATTGTCAGCAA-3'<br>R: 5'-AGATCCACAACGGATACATT-3'   | 60      |

**Supplementary Table 2. Biochemical analysis of serum parameters in TAA-injured rat model.**

| Group        | AST (U/L)                     | ALT (U/L)                    | Total bilirubin (μmol/L)    | Albumin (g/L)                |
|--------------|-------------------------------|------------------------------|-----------------------------|------------------------------|
| Normal (n=6) | 85.06 ± 6.94                  | 43.63 ± 2.14                 | 0.86 ± 0.22                 | 43.11 ± 0.97                 |
| NTx (n=7)    | 168.06 ± 12.52 <sup>*</sup>   | 117.32 ± 5.97 <sup>*</sup>   | 11.275 ± 0.42 <sup>*</sup>  | 31.09 ± 1.17 <sup>*</sup>    |
| Tx (n=6)     | 124.48 ± 5.05 <sup>*,**</sup> | 86.73 ± 4.07 <sup>*,**</sup> | 6.32 ± 0.74 <sup>*,**</sup> | 37.42 ± 0.47 <sup>*,**</sup> |

ALT, Alanine aminotransferase; AST, Aspartate transaminase. \* Significantly different versus Normal (\* $p < 0.05$ ). \*\* Significantly different versus NTx (\*\* $p < 0.05$ ).
